# Supplementary material
Source: HighWire-hosted journal article supplement (https://jcp.bmj.com/content/72/12/785)
Supplement: inline-supplementary-material-1 [file inline-supplementary-material-1.pdf]

**Supplementary Table 1. Examples of blood-based assays in clinical studies of CV diseases**

| Circulating biomarker | Type of study                  | Study size                                                                                                                                                                   | Technique                                        | Results                                                                                                                                                                                                                                         | Clinical use                                                                                                                                                           | Ref. |
|-----------------------|--------------------------------|------------------------------------------------------------------------------------------------------------------------------------------------------------------------------|--------------------------------------------------|-------------------------------------------------------------------------------------------------------------------------------------------------------------------------------------------------------------------------------------------------|------------------------------------------------------------------------------------------------------------------------------------------------------------------------|------|
| <b>CECs</b>           | Case-control                   | 24 HT, 25 DN, 27 HFpEF, 25 HFrEF compared to 11 controls.                                                                                                                    | Flow cytometry                                   | Increased CEC number in DN and HFpEF patients.                                                                                                                                                                                                  | CEC counts is a putative diagnostic biomarker for detection of DN and HFpEF.                                                                                           | [20] |
| <b>CECs/ET-1</b>      | Case-control                   | 15 cases of left-to-right shunt CHD without PAH, 26 cases of CHD complicated with mild PAH, and 17 cases of CHD complicated with moderate-severe PAH compared to 30 controls | Flow cytometry<br>ELISA                          | Higher levels of CECs and ET-1 in the group of moderate-severe PAH compared to other study groups. Mean pulmonary artery pressure positively correlated with percentage of CECs as well as ET-1 production.                                     | CECs and ET-1 could be used as clinical biomarkers to define management of PAH patients.                                                                               | [42] |
| <b>EPCs/oxLDL</b>     | Cross-sectional, observational | 33 patients with stable CHD                                                                                                                                                  | Flow cytometry<br>ELISA                          | Patients with stable CHD had a high prevalence of coronary endothelial dysfunction, which was associated with lower numbers of circulating EPCs. A positive correlation between oxLDL and EPCs suggest a statin-mediated host-repair mechanism. | Combination of EPCs, oxLDL, and QCA to promote endothelial function which, in turn, may improve cardiovascular health.                                                 | [43] |
| <b>cfDNA</b>          | Case-control                   | 54 acute ischemic stroke patients treated with intravenous thrombolysis compared to 15 controls                                                                              | RT-PCR                                           | Lower cfDNA levels was found in patients who neurologically improved at 48 h                                                                                                                                                                    | cfDNA could be a surrogate marker for monitoring tPA efficacy by the prediction of short-term neurological outcome.                                                    | [21] |
| <b>cfDNA</b>          | Prospective                    | 160 AMI patients compared with 30 controls                                                                                                                                   | Quantitation by using fluorescence detection     | cfDNA levels were higher AMI patients compared with controls and discriminated severity of the disease.                                                                                                                                         | Circulating cfDNA levels in AMI patients may be an alternative approach to monitor the disease and identify high-risk individuals that may undergo reinfarction or HF. | [47] |
| <b>dd-cfDNA</b>       | Prospective cohort study       | 21 pediatric and 44 adult patients undergoing HTx (565 plasma samples)                                                                                                       | Quantitative-GTD based on shotgun SNP genotyping | Higher levels of dd-cfDNA provided an early diagnosis of acute rejection.                                                                                                                                                                       | GTD may detect acute reactions up to 5 months before EMB suggesting a potential to complement or replace existing gold-standard approaches.                            | [22] |
| <b>circANRIL</b>      | Cross-sectional cohort study   | Endarterectomy samples from 218 CHD patients                                                                                                                                 | Proteomic screening, bioinformatics              | <i>circANRIL</i> can regulate pre-rRNA maturation                                                                                                                                                                                               | <i>circANRIL</i> may confer atheroprotection by modulating apoptosis                                                                                                   | [49] |

|                         |              |                                                                                                                                                    |                         |                                                                                                                                                                                                                                                                           |                                                                                                                                                                                                        |      |
|-------------------------|--------------|----------------------------------------------------------------------------------------------------------------------------------------------------|-------------------------|---------------------------------------------------------------------------------------------------------------------------------------------------------------------------------------------------------------------------------------------------------------------------|--------------------------------------------------------------------------------------------------------------------------------------------------------------------------------------------------------|------|
|                         |              | undergoing vascular surgery                                                                                                                        | and functional studies. | controlling ribosome biogenesis and nucleolar stress.                                                                                                                                                                                                                     | and proliferation in human vascular cells and tissues. (Therapeutic agent ?)                                                                                                                           |      |
| <b>circRNAs</b>         | Case-control | 12 CHD patients and 12 controls                                                                                                                    | RNA microarray          | hsa_circ_0124644 was significantly upregulated in CHD patients respect with controls.                                                                                                                                                                                     | hsa_circ_0124644 can be used as a diagnostic biomarker of CHD.                                                                                                                                         | [50] |
| <b>MICRA</b>            | Case-control | 472 patients with AMI at the time of reperfusion after percutaneous intervention                                                                   | qRT-PCR                 | MICRA levels were lower in patients with reduced EF compared to mid-range EF or preserved EF.                                                                                                                                                                             | MICRA may be a useful predictive biomarker of post-IMI LV dysfunction.                                                                                                                                 | [51] |
| <b>hsa_circ_0037911</b> | Case-control | 100 EH respect with 100 controls                                                                                                                   | qRT-PCR                 | hsa_circ_0037911 levels were significantly higher in EH patients than controls and positively correlated with Scr.                                                                                                                                                        | hsa_circ_0037911 may regulate the concentration of Scr providing a stable biomarker for early diagnosis of EH.                                                                                         | [52] |
| <b>cfDNA</b>            | Case-control | 57 STEMI patients respect with 83 controls                                                                                                         | ddPCR                   | Higher levels of cardiac cfDNA was observed STEMI patients respect with controls.                                                                                                                                                                                         | Measurements of cardiac cfDNA capture cardiomyocyte cell death associated with myocardial infarction, and that the cardiac cfDNA assay can identify myocardial cell death early after ischemia ensues. | [55] |
| <b>miR-92a</b>          | Prospective  | 40 ACS patients with prior history of CHD and T2D, 40 ACS patients with diagnosis of CHD for more than 2 years with no history of T2D, 68 controls | qRT-PCR                 | Higher levels of miR-92a was associated with an increased risk of ACS in CHD-T2D group.                                                                                                                                                                                   | A multipanel of miR-92a, HbA1c, and SBP may have a powerful predictive value of ACS in T2D                                                                                                             | [63] |
| <b>miRNAs</b>           | Prospective  | 137 patients with AHF, 20 with CHF, 8 with acute exacerbation of COPD, and 41 controls                                                             | qRT-PCR                 | Lower levels of miR-18a-5p, miR-26b-5p, miR-27a-3p, miR-30e-5p, miR-106a-5p, miR-199a-3p, and miR-652-3p were associated with AHF group. Lower levels of let-7i, miR-18b, miR-18a, miR-223, miR-301a, miR-652 and miR-423 may be predictive for mortality in AHF patients | These miRNA panels may be useful to predict increasing acuity in and mortality in AHF patients. Moreover, these molecules may suggest novel miRNA-based therapies.                                     | [65] |
| <b>miR-132</b>          | Case-control | A subset of 953 patients CHF from the GISSI-HF trial                                                                                               | qRT-PCR                 | Higher levels of miR-132 were independently associated with                                                                                                                                                                                                               | miR-132 may be a useful risk biomarker of risk of future hospitalization for HF                                                                                                                        | [66] |

|                                              |               |                                                                                 |         |                                                                                                                                                      |                                                                                                                                        |      |
|----------------------------------------------|---------------|---------------------------------------------------------------------------------|---------|------------------------------------------------------------------------------------------------------------------------------------------------------|----------------------------------------------------------------------------------------------------------------------------------------|------|
|                                              |               | and controls                                                                    |         | younger age, better renal filtration, ischemic aetiology and severity of HF symptoms, higher DBP, higher cholesterol, and male sex.                  | patients                                                                                                                               |      |
| <b>miRNAs</b>                                | Prospective   | 834 CHF patients from cohort 1 and 1369 CHF patients from cohort 2 and controls | qRT-PCR | Higher levels of miR-1254 and miR-1306-5p were significantly associated with all-cause mortality and risk hospitalization in both cohorts.           | miR-1254 and miR-1306-5p may be useful prognostic biomarkers in CHF.                                                                   | [67] |
| <b>NETs</b>                                  | Prospective   | 48 patients after cardiac surgery with cardiopulmonary bypass and controls      | ELISA   | Circulating histone levels were higher in patients with adverse events postoperatively.                                                              | Circulating histones may be used as a prognostic indicator for patients after cardiopulmonary bypass.                                  | [69] |
| <b>NETs</b>                                  | Prospective   | 87 patients undergoing cardiac surgery and controls                             | ELISA   | Higher serum levels of ds-DNA were observed postoperatively and associated with perioperative renal dysfunction.                                     | dsDNA levels may be predictive of NET amount in serum suggesting a poor prognostic indicator for patients after cardiopulmonary bypass | [70] |
| <b>EVs containing miRNAs (microvesicles)</b> | Prospective   | 176 patients with stable CHD and controls                                       | qRT-PCR | Higher levels of EVs carrying miR-126 and miR-199a were associated with a lower risk of future MACEs.                                                | EV-related miR-126 and miR-199a may be predictive of better prognosis in CHD patients.                                                 | [80] |
| <b>EVs containing miRNAs (exosomes)</b>      | Case-controls | 145 AMI patients and controls                                                   | qRT-PCR | Hypoxia-induced miR-30a was highly enriched in exosomes from the serum of AMI patients respect with controls.                                        | Exosome-related miR-30a may be a useful indicator of autophagy of cardiomyocytes. (Novel therapeutic target?)                          | [81] |
| <b>EVs containing miRNAs (exosomes)</b>      | Prospective   | 21 patients developing HF within 1 year after AMI and 65 controls               | qRT-PCR | Higher levels of exosome-related miR-192, miR-194, and miR-34a were associated with HF development <i>via</i> the p53 pathway.                       | Exosome-related miR-192, miR-194, and miR-34a may be useful prognostic predictors of ischemic HF development after AMI.                | [82] |
| <b>Metabolites</b>                           | Prospective   | 7256 subjects from the National Finnish FINRISK study                           | NMR     | Changes in expression levels of phenylalanine, MUFA, omega-6 fatty acids, and DHA were associated with cardiovascular events in a 15 year follow-up. | MUFA, omega-6 fatty acids, and DHA may be useful additional prognostic biomarkers of cardiovascular events.                            | [88] |
| <b>Metabolites</b>                           | Prospective   | 1,670 individuals from three independent                                        | MS-HPLC | Changes in plasma levels of lipid fractions,                                                                                                         | Lipid fractions, glucose, valine, ornithine, glutamate,                                                                                | [89] |

|                    |             |                                                         |    |                                                                                                                                       |                                                                                                                                                                      |      |
|--------------------|-------------|---------------------------------------------------------|----|---------------------------------------------------------------------------------------------------------------------------------------|----------------------------------------------------------------------------------------------------------------------------------------------------------------------|------|
|                    |             | cohorts of study from the Swedish Twin Register         |    | glucose, valine, ornithine, glutamate, creatinine, glycoproteins, citrate and 1,5-anhydrosorbitol were associated with CHD onset.     | creatinine, glycoproteins, citrate and 1,5-anhydrosorbitol may be useful predictive biomarkers for CHD onset in the general population.                              |      |
| <b>Metabolites</b> | Prospective | 3924 subjects from three independent cohorts without HF | MS | Changes in circulating levels of the haem breakdown product urobilin and sphingomyelin (30:1) were associated with development of HF. | Changes in circulating levels of the haem breakdown product urobilin and sphingomyelin (30:1) may be useful non-invasive predictors of HF in the general population. | [90] |

**Abbreviations:** ACS: acute coronary syndrome; AHF: acute heart failure; AMI: acute myocardial infarction; CEC: circulating endothelial cells; CHD: coronary heart disease; CHF: chronic heart failure; cfDNA: cell-free DNA; circRNAs: circular RNAs; circANRIL: circular antisense non-coding RNA in the INK4 locus; COPD: chronic obstructive pulmonary disease; DBP: diastolic blood pressure; dd-PCR: digital droplet polymerase chain reaction; dd-cfDNA: donor derived cell-free DNA; DHA: docosahexaenoic acid; DN: diabetic nephropathy; dsDNA: double strand DNA; EH: essential hypertension; ELISA: enzyme-linked immunosorbent assay; EPCs: endothelial progenitor cells; ET-1: endothelin 1; EV: extra-cellular vesicles; HbA1c: glycosylated hemoglobin; FAM101A: refilin A; GTD: genome transplant dynamics; HFpEF: heart failure preserved ejection fraction; HFrEF: heart failure reduced ejection fraction; HPLC: high performance liquid chromatography; HT: hypertension; HTx: heart transplantation; LV: left ventricle; MACEs: major adverse cardiovascular events; miRNAs: micro-RNAs; MS: mass spectrometry; MUFA: monounsaturated fatty acids; NETs: neutrophil extracellular traps; NMR: nuclear magnetic resonance; NSTEMI: non-ST-segment elevation acute coronary syndrome; oxLDL: oxidized low-density lipoprotein; pre-rRNA: precursor ribosomal RNA; QCA: quantitative coronary angiography; qRT-PCR: quantitative real-time polymerase chain reaction; SBP: systolic blood pressure; Scr: serum creatinine; SNP: single nucleotide polymorphisms; STEMI: acute ST-elevation myocardial infarctions; T2D: type 2 diabetes; tPA: tissue plasminogen activator.
